# Supplementary material for: Cyber-attack method and perpetrator prediction using machine learning algorithms
Source: PeerJ Comput Sci. 2021 Apr 9;7:e475. doi: 10.7717/peerj-cs.475 (PMC8049120; doi:10.7717/peerj-cs.475)
Supplement: Supplemental Information 1 [file peerj-cs-07-475-s001.xlsx]

## Sheet: Sayfa1
	Crime	Gender	Age	Income	Job	Maritalstatus	Education	Harm	Attack	AttackMethod	Perpetrator
0	0	0	2	1	1	1	3	4	2	5	1
1	0	1	0	0	9	0	2	1	2	0	1
2	0	0	2	0	2	1	3	1	2	0	1
3	0	0	2	0	1	1	2	0	2	0	1
4	0	0	2	0	0	1	2	1	2	0	0
5	0	0	3	0	2	1	3	0	0	1	0
6	0	0	3	2	6	1	1	1	2	0	1
7	0	0	2	0	1	1	3	1	2	0	0
8	0	1	2	1	6	0	0	1	2	0	0
9	0	0	2	1	1	1	3	1	2	0	0
10	0	0	2	1	2	1	3	1	2	0	1
11	0	0	2	0	1	1	3	1	2	0	0
12	0	0	2	0	1	1	3	1	2	0	0
13	0	1	2	0	1	0	3	1	2	0	1
14	0	0	3	1	1	1	2	1	2	0	0
15	0	0	3	1	1	1	2	1	2	0	0
16	0	0	1	0	1	1	2	1	2	0	1
17	0	0	2	1	1	1	2	1	2	0	0
18	0	0	3	0	1	1	2	1	2	0	0
19	0	0	2	1	0	1	0	1	2	0	0
20	0	0	2	0	1	1	3	1	2	0	1
21	0	0	0	1	1	1	0	1	2	0	0
22	0	0	1	1	1	1	2	1	2	0	0
23	0	1	2	1	6	1	0	1	2	0	0
24	0	0	3	1	2	1	2	4	2	5	0
25	0	0	3	0	1	1	2	1	2	0	0
26	0	0	3	1	1	1	0	1	2	0	1
27	0	0	1	1	1	1	2	1	2	0	0
28	0	0	3	1	1	1	2	1	2	0	1
29	0	0	2	1	8	1	2	0	0	1	0
30	0	1	0	1	6	0	2	1	2	0	0
31	0	1	0	1	1	0	2	1	2	0	1
32	0	0	3	0	1	1	3	0	0	1	1
33	0	0	2	0	1	1	2	1	2	0	0
34	0	0	3	0	1	1	2	1	2	0	0
35	0	1	1	0	3	1	3	1	2	0	1
36	0	0	2	0	1	1	3	1	2	0	1
37	0	1	1	0	1	0	3	0	2	0	1
38	0	0	3	0	1	1	3	1	2	0	1
39	0	0	2	0	1	1	3	0	2	0	1
40	0	1	2	0	1	1	3	0	2	0	0
41	0	0	2	0	1	1	2	1	2	0	0
42	0	0	1	1	1	1	2	1	2	0	1
43	0	0	1	1	1	1	2	1	2	0	1
44	0	1	3	0	3	1	2	1	2	0	1
45	0	1	0	1	6	0	2	1	2	0	1
46	0	0	2	0	1	1	3	1	2	0	0
47	0	0	3	1	1	1	2	1	2	0	0
48	0	1	1	1	4	1	0	1	2	0	1
49	0	0	3	1	1	1	0	1	2	0	1
50	0	0	1	0	0	1	0	1	2	0	1
51	0	0	2	0	1	1	2	4	2	5	1
52	0	0	1	0	1	1	2	1	2	0	0
53	0	0	2	2	6	1	1	1	2	0	0
54	0	0	3	1	1	1	2	1	2	0	0
55	0	0	3	1	1	1	2	1	2	0	0
56	0	0	2	1	1	1	2	1	2	0	1
57	0	0	3	1	2	0	2	4	2	5	0
58	0	0	1	1	7	0	2	1	2	0	0
59	0	0	2	1	1	1	2	1	2	0	1
60	0	0	2	0	1	1	3	4	2	5	0
61	0	1	3	2	6	1	1	1	2	0	0
62	0	0	3	0	2	1	3	1	2	0	0
63	0	0	3	0	1	1	3	1	2	0	1
64	0	0	1	1	0	1	2	4	2	5	1
65	0	0	0	2	6	0	1	1	2	0	1
66	0	0	2	1	1	1	2	1	2	0	0
67	0	0	0	0	1	0	2	1	2	0	0
68	0	0	2	1	1	1	2	1	2	0	0
69	0	1	0	0	1	1	0	0	0	1	0
70	0	1	2	0	1	0	2	1	2	0	1
71	0	1	2	0	1	0	2	1	2	0	1
72	0	0	1	2	6	1	1	4	2	5	0
73	0	1	0	0	7	0	0	0	0	1	1
74	0	0	2	1	1	1	2	1	2	0	0
75	0	0	2	0	1	1	2	1	2	0	0
76	0	0	0	0	9	0	2	1	2	0	0
77	0	1	2	1	4	1	0	0	2	0	0
78	0	1	0	0	1	0	2	0	2	0	0
79	0	1	3	2	6	1	1	0	2	0	1
80	0	0	1	1	0	1	0	0	2	0	0
81	0	0	2	0	1	1	3	1	2	0	0
82	0	0	3	0	2	1	3	1	2	0	1
83	0	0	1	1	0	1	0	1	2	0	1
84	0	0	2	1	1	1	2	1	2	0	1
85	0	0	1	0	1	1	2	1	2	0	0
86	0	0	0	1	1	1	2	1	2	0	1
87	0	0	2	1	7	0	0	1	2	0	0
88	0	0	1	1	0	0	1	4	2	5	0
89	0	0	2	1	4	1	0	1	2	0	0
90	0	0	2	0	1	1	2	1	2	0	0
91	0	0	1	1	1	1	2	1	2	0	0
92	0	0	1	1	0	1	2	1	2	0	0
93	0	0	0	0	0	1	2	1	2	0	0
94	0	0	2	0	1	1	3	1	2	0	1
95	0	0	3	1	4	1	0	1	2	0	1
96	0	0	2	2	1	0	3	1	2	0	0
97	0	0	2	0	1	1	3	0	0	1	0
98	0	0	3	2	7	1	0	3	2	5	0
99	0	0	3	0	1	1	3	4	2	5	1
100	0	0	3	1	1	1	2	4	2	5	1
101	0	0	3	0	2	1	0	0	0	1	1
102	0	1	3	0	2	0	3	4	2	5	1
103	0	1	2	0	3	1	2	0	0	1	1
104	0	0	2	0	1	1	2	1	2	0	1
105	0	1	1	0	3	1	2	1	2	0	1
106	0	1	0	1	4	1	0	3	2	5	1
107	0	1	0	0	1	0	3	0	0	1	1
108	0	0	3	1	4	1	0	3	2	5	1
109	0	0	3	1	4	1	1	0	2	2	1
110	0	0	1	1	1	1	2	1	2	0	1
111	0	0	2	1	4	0	0	1	2	0	1
112	0	0	2	2	1	1	0	4	2	5	0
113	0	0	0	2	6	0	1	1	2	0	1
114	0	1	1	0	0	0	2	1	2	0	1
115	0	1	2	0	1	0	3	0	0	1	1
116	0	0	3	1	4	1	0	4	2	5	1
117	0	0	0	1	6	0	2	1	2	0	1
118	0	0	1	1	1	1	2	0	2	0	0
119	0	0	2	1	1	1	3	0	0	1	1
120	0	0	0	0	1	1	3	0	2	0	1
121	0	0	3	0	1	1	3	1	2	0	1
122	0	0	2	2	6	1	1	3	2	5	1
123	0	0	2	1	1	1	3	1	2	0	1
124	0	0	3	0	1	1	3	4	2	5	1
125	0	0	2	1	1	0	2	1	2	0	1
126	0	0	1	0	1	0	3	1	2	0	1
127	0	1	2	0	3	0	2	1	2	0	1
128	0	1	0	0	1	1	3	1	2	0	1
129	0	1	0	0	9	0	2	1	2	0	1
130	0	0	1	1	4	1	1	0	0	1	1
131	0	0	1	0	0	1	2	0	0	1	1
132	0	0	1	2	5	1	0	0	0	1	1
133	0	0	3	1	6	1	1	0	0	1	1
134	0	1	2	0	3	1	2	1	2	0	1
135	0	0	0	0	9	0	2	0	0	1	1
136	0	0	3	0	2	1	2	0	0	1	1
137	0	0	3	0	2	0	2	4	2	5	0
138	0	0	3	0	1	1	2	4	2	5	0
139	0	1	1	0	3	1	2	0	0	1	1
140	0	1	3	1	4	1	1	1	2	0	1
141	0	0	0	0	1	0	3	1	2	0	1
142	0	0	3	0	2	1	2	1	2	0	0
143	0	0	2	1	0	1	0	1	2	0	1
144	0	0	0	0	9	0	2	0	2	2	0
145	0	1	2	0	5	0	0	4	2	5	1
146	0	0	1	0	1	1	2	1	2	0	1
147	0	0	2	0	1	1	2	1	2	0	0
148	0	0	2	1	1	1	3	0	2	0	1
149	0	0	2	1	0	1	0	0	2	2	0
150	0	0	2	0	2	1	0	1	2	0	1
151	0	0	0	1	0	1	2	1	2	0	0
152	0	1	2	1	6	1	2	4	2	5	0
153	0	0	1	1	0	1	0	1	2	0	0
154	0	0	0	0	9	0	2	1	2	0	0
155	0	0	1	2	6	0	1	1	2	0	1
156	0	0	1	1	1	1	2	1	2	0	1
157	0	1	1	0	3	0	2	1	2	0	0
158	0	0	2	1	1	1	2	1	2	0	0
159	0	0	1	0	1	1	0	4	2	5	0
160	0	0	2	0	7	1	0	1	2	0	1
161	0	0	3	1	4	1	1	0	2	2	0
162	0	0	1	1	1	1	0	1	2	0	0
163	0	0	0	0	0	0	2	1	2	0	1
164	0	0	3	1	6	1	2	1	2	0	0
165	0	0	1	1	4	1	0	0	0	1	0
166	0	0	1	0	0	1	0	1	2	0	1
167	0	1	2	0	3	1	2	1	2	0	1
168	0	0	1	0	0	1	2	1	2	0	1
169	0	0	3	0	1	1	3	1	2	0	0
170	0	0	3	0	1	1	2	1	2	0	1
171	0	1	0	0	9	0	2	1	2	0	1
172	0	0	3	0	1	1	2	4	2	5	1
173	0	0	3	0	1	1	3	1	2	0	1
174	0	0	2	0	1	1	2	4	2	5	0
175	0	0	2	2	6	1	0	0	0	1	1
176	0	0	1	1	7	1	0	0	0	1	1
177	0	0	2	0	1	1	2	1	2	0	0
178	0	0	3	0	1	1	0	1	2	0	1
179	0	0	1	0	1	1	2	1	2	0	1
180	0	0	1	1	6	1	2	1	2	0	1
181	0	0	1	0	1	1	3	1	2	0	1
182	0	0	1	1	4	1	0	1	2	0	1
183	0	0	0	0	9	0	2	1	2	0	0
184	0	0	3	1	4	0	0	1	2	0	0
185	0	0	2	1	4	1	0	4	2	5	1
186	0	0	3	0	2	1	2	4	2	5	0
187	0	0	0	0	1	1	2	1	2	0	0
188	0	0	2	0	1	1	3	4	2	5	0
189	0	0	3	0	2	1	2	4	2	5	1
190	0	0	0	0	9	1	2	4	2	5	0
191	0	0	3	0	1	1	3	1	2	0	1
192	0	0	3	0	2	1	3	1	2	0	0
193	0	0	2	0	1	1	3	0	0	1	1
194	0	0	3	1	1	1	3	1	2	0	0
195	0	0	1	1	0	1	0	1	2	0	1
196	0	0	2	1	4	1	3	1	2	0	1
197	0	0	1	0	1	0	2	1	2	0	1
198	0	0	2	1	6	1	2	1	2	0	1
199	0	0	1	1	4	1	0	1	2	0	1
200	0	0	1	1	0	1	0	1	2	0	1
201	0	0	2	1	0	1	0	1	2	0	1
202	0	0	1	1	4	1	0	1	2	0	1
203	0	0	1	0	0	1	0	1	2	0	1
204	0	0	2	0	1	1	2	1	2	0	0
205	0	0	1	1	6	1	2	1	2	0	1
206	0	0	3	0	0	1	0	1	2	0	1
207	0	0	1	0	1	1	2	1	2	0	1
208	0	0	2	1	1	1	2	1	2	0	1
209	0	0	2	1	0	1	0	4	2	5	0
210	0	1	1	1	6	1	2	0	0	1	0
211	0	0	1	2	1	1	0	1	2	0	1
212	0	0	2	0	1	1	2	1	2	0	1
213	0	0	3	0	0	1	0	1	2	0	1
214	0	1	2	1	6	1	3	1	2	0	1
215	0	0	1	1	0	1	0	1	2	0	1
216	0	0	3	0	1	1	3	1	2	0	0
217	0	0	1	0	1	1	2	1	2	0	1
218	0	1	2	1	0	1	1	1	2	0	0
219	0	0	2	0	1	1	3	1	2	0	1
220	0	0	1	0	1	1	3	1	2	0	1
221	0	1	1	1	1	0	1	1	2	0	0
222	0	0	2	2	4	1	1	1	2	0	0
223	0	0	2	1	1	1	2	1	2	0	1
224	0	1	1	1	0	0	2	1	2	0	0
225	0	0	2	1	4	0	1	1	2	0	0
226	0	1	2	0	1	1	0	1	2	0	0
227	0	1	2	1	1	1	0	4	2	5	0
228	0	0	1	1	0	1	0	1	2	0	0
229	0	1	1	0	1	1	0	1	2	0	1
230	0	1	1	1	1	1	0	1	2	0	1
231	0	0	3	2	1	1	3	1	2	0	0
232	0	0	2	0	1	1	0	1	2	0	0
233	0	0	2	1	1	1	0	1	2	0	0
234	0	0	2	0	0	1	2	4	2	5	1
235	0	0	1	0	1	1	3	4	2	5	1
236	0	0	2	1	1	1	3	0	2	0	1
237	0	0	2	1	1	1	3	4	2	5	0
238	0	0	3	1	2	1	2	0	0	1	1
239	0	0	3	1	2	1	0	4	2	5	1
240	0	0	1	1	1	0	0	0	0	1	1
241	0	0	0	1	1	1	0	4	2	5	1
242	0	0	1	1	1	0	2	4	2	5	1
243	0	0	2	2	0	1	0	1	2	0	1
244	0	1	0	1	1	0	0	4	2	5	0
245	0	1	1	1	1	0	2	4	2	5	0
246	0	1	0	1	1	0	2	4	2	5	0
247	0	1	0	0	1	0	3	4	2	5	0
248	0	0	0	1	1	0	2	4	2	5	0
249	0	1	0	0	1	0	2	4	2	5	0
250	0	1	0	1	1	0	2	4	2	5	0
251	0	0	2	0	2	1	3	1	2	0	1
252	0	0	2	0	1	1	2	0	0	1	0
253	0	1	0	2	7	0	0	4	2	5	1
254	0	0	2	1	4	1	0	4	2	5	1
255	0	0	3	1	1	1	3	1	2	0	0
256	0	0	3	0	2	1	2	4	2	5	0
257	0	0	3	0	2	1	3	4	2	5	1
258	0	0	3	0	2	1	0	4	2	5	1
259	0	0	3	0	2	1	0	1	2	0	1
260	0	0	2	2	1	1	3	3	2	5	0
261	0	1	2	1	4	1	0	1	2	0	1
262	0	0	1	1	1	1	2	1	2	0	0
263	0	0	2	1	2	1	2	3	2	5	0
264	0	0	2	2	5	1	0	1	2	0	1
265	0	0	2	1	1	1	3	3	2	5	1
266	0	0	2	2	7	1	1	4	2	5	1
267	0	0	2	2	7	1	0	4	2	5	1
268	0	1	0	0	9	0	2	0	0	1	1
269	0	0	1	1	1	1	0	4	2	5	1
270	0	0	2	0	1	1	2	1	2	0	1
271	0	0	1	1	0	1	0	1	2	0	1
272	0	0	1	1	1	0	3	3	2	5	1
273	0	0	1	2	1	0	2	1	2	0	1
274	0	0	3	2	5	1	0	1	2	0	1
275	0	1	2	0	3	1	3	3	2	5	1
276	0	1	2	0	3	0	3	1	2	0	1
277	0	0	2	1	1	1	3	1	2	0	1
278	0	0	3	0	2	0	3	3	2	5	0
279	0	1	1	1	6	1	1	1	2	0	1
280	0	0	3	2	4	1	1	3	2	5	0
281	0	0	3	1	8	1	2	3	2	5	0
282	0	0	3	0	1	1	3	3	2	5	0
283	0	0	2	1	1	1	2	1	2	0	1
284	0	0	0	0	1	0	3	3	2	5	1
285	0	1	2	0	3	1	3	3	2	5	1
286	0	0	2	2	0	1	2	3	2	5	0
287	0	1	2	1	4	0	0	3	2	5	1
288	0	0	2	1	0	1	2	1	2	0	1
289	0	0	3	1	1	1	2	3	2	5	1
290	0	0	1	1	4	0	0	3	2	5	0
291	0	0	2	2	5	1	0	4	2	5	1
292	0	1	1	0	3	1	2	3	2	5	0
293	0	0	0	0	9	0	2	1	2	0	1
294	0	0	1	2	8	1	0	1	2	0	1
295	0	0	0	1	0	1	0	1	2	0	1
296	0	1	2	1	1	0	2	3	2	5	1
297	0	1	0	1	4	1	0	1	2	0	1
298	0	0	3	2	8	1	0	3	2	5	1
299	0	0	0	0	0	1	0	1	2	0	0
300	0	0	1	0	1	0	3	4	2	5	0
301	0	0	0	1	1	1	3	0	2	0	0
302	0	0	2	1	4	1	0	4	2	5	0
303	0	0	0	1	6	0	0	0	2	0	1
304	0	0	1	2	7	1	0	3	2	5	0
305	0	0	1	2	0	1	0	1	2	0	0
306	0	0	1	1	5	1	0	4	2	5	0
307	0	0	1	1	8	1	2	1	2	0	1
308	0	1	0	1	4	1	2	1	2	0	1
309	0	1	2	1	7	1	0	1	2	0	0
310	0	0	2	1	2	1	2	4	2	5	1
311	0	1	2	1	4	0	3	4	2	5	0
312	0	0	1	1	4	1	1	1	2	0	0
313	0	0	2	1	8	1	0	0	0	1	0
314	0	0	3	1	2	1	2	4	2	5	1
315	0	0	3	1	8	1	0	1	2	0	1
316	0	1	2	0	1	1	3	4	2	5	0
317	0	0	1	1	0	1	0	1	2	0	0
318	0	0	3	1	2	1	0	1	2	0	1
319	0	0	1	0	1	1	0	1	2	0	0
320	0	0	2	1	1	1	2	3	2	5	0
321	0	0	1	1	0	1	2	1	2	0	1
322	0	0	0	0	9	1	1	1	2	0	0
323	0	0	2	1	1	1	3	4	2	5	1
324	0	1	1	0	1	1	2	0	2	0	0
325	0	0	2	1	6	1	0	1	2	0	1
326	0	0	3	2	7	1	0	1	2	0	0
327	0	0	2	0	7	1	0	1	2	0	1
328	0	1	1	1	0	1	0	4	2	5	0
329	0	0	0	1	4	1	2	1	2	0	1
330	0	0	1	0	1	1	2	1	2	0	0
331	0	0	3	1	5	1	0	1	2	0	0
332	0	0	1	1	8	1	0	1	2	0	0
333	0	0	2	1	6	1	0	1	2	0	0
334	0	0	2	0	1	1	3	1	2	0	0
335	0	0	1	1	0	1	2	1	2	0	1
336	0	1	2	1	4	1	0	1	2	0	0
337	0	0	3	0	1	1	2	1	2	0	1
338	0	0	2	1	4	1	3	1	2	0	0
339	0	0	1	1	8	1	0	1	2	0	0
340	0	0	2	1	0	1	0	1	2	0	0
341	0	0	3	1	4	1	0	0	0	1	1
342	0	1	1	0	0	1	0	4	2	5	1
343	0	0	3	1	1	1	2	4	2	5	0
344	0	0	1	1	1	1	2	0	2	2	0
345	0	0	1	1	4	1	1	1	2	0	1
346	0	0	0	0	1	0	0	1	2	0	1
347	0	0	0	0	9	0	1	4	2	5	0
348	0	0	3	1	8	1	0	1	2	0	0
349	0	0	3	0	2	1	3	1	2	0	0
350	0	1	2	0	1	1	3	0	0	1	0
351	0	0	3	0	2	1	1	3	2	5	0
352	0	0	1	0	0	1	2	1	2	0	0
353	0	1	0	1	1	0	0	0	2	2	1
354	0	0	3	1	6	1	0	0	0	1	1
355	0	0	1	1	0	1	0	0	0	1	1
356	0	0	2	1	1	1	3	3	2	5	0
357	0	0	1	1	0	1	2	0	2	2	1
358	0	0	2	1	1	1	0	1	2	0	0
359	0	0	0	1	0	1	0	0	2	2	0
360	0	0	1	0	1	0	2	1	2	0	1
361	0	0	2	1	5	1	2	1	2	0	0
362	0	1	1	0	1	0	3	0	0	1	1
363	0	0	1	0	1	1	0	3	2	5	1
364	0	0	3	1	4	1	3	3	2	5	0
365	0	0	3	0	1	1	2	0	2	2	0
366	0	0	2	1	4	1	3	3	2	5	0
367	0	0	3	1	7	1	0	1	2	0	0
368	0	0	2	1	1	1	2	0	0	1	1
369	0	0	2	1	8	1	0	0	2	2	1
370	0	0	2	0	1	1	3	0	0	1	1
371	0	0	3	0	2	1	0	0	0	1	0
372	0	0	3	0	2	1	2	3	2	5	0
373	0	0	2	1	1	1	2	1	2	0	0
374	0	1	0	1	6	0	2	0	0	1	1
375	0	0	0	1	6	0	2	1	2	0	1
376	0	0	1	1	0	1	0	0	2	2	0
377	0	0	1	0	9	1	2	1	2	0	1
378	0	0	3	0	2	1	3	0	2	2	0
379	0	0	3	0	2	1	3	1	2	0	1
380	0	0	0	0	7	1	0	0	2	2	0
381	0	0	1	0	1	1	2	1	2	0	1
382	0	0	0	1	0	0	2	0	2	0	1
383	0	0	0	0	9	0	0	1	2	0	0
384	0	0	3	0	2	1	1	3	2	5	0
385	0	1	2	1	1	0	0	4	2	5	0
386	0	0	2	1	1	1	2	1	2	0	1
387	0	0	3	1	2	1	3	1	2	0	1
388	0	0	1	0	0	1	2	1	2	0	0
389	0	0	1	1	4	1	1	1	2	0	1
390	0	1	2	1	2	0	3	4	2	5	0
391	0	0	2	1	1	1	3	4	2	5	0
392	0	0	2	0	1	1	3	0	0	1	0
393	0	0	2	0	1	1	3	1	2	0	1
394	0	0	1	1	0	1	0	1	2	0	1
395	0	1	0	0	3	1	2	0	0	1	1
396	0	0	3	1	7	1	0	1	2	0	1
397	0	0	1	2	6	1	1	1	2	0	1
398	0	1	1	0	1	1	3	4	2	5	0
399	0	0	1	1	4	1	0	0	2	2	1
400	0	0	1	1	4	1	0	3	2	5	0
401	0	1	1	2	4	0	0	0	2	0	1
402	0	0	1	1	5	0	0	0	2	2	0
403	0	0	0	1	0	1	0	4	2	5	0
404	0	0	1	1	0	1	0	0	2	2	0
405	0	1	0	1	7	0	0	0	2	0	1
406	0	0	0	1	6	1	0	0	2	2	0
407	0	0	0	0	9	0	2	0	2	2	0
408	0	1	0	0	9	0	0	0	2	2	0
409	0	1	1	0	1	1	3	0	0	1	1
410	0	0	0	0	9	0	0	0	2	2	0
411	0	0	1	1	4	1	0	0	2	2	0
412	0	0	1	0	1	1	0	3	2	5	0
413	0	0	0	0	9	0	0	0	2	2	0
414	0	0	1	0	1	1	2	3	2	5	0
415	0	0	3	1	1	1	1	0	2	0	0
416	0	0	1	1	4	1	0	0	2	2	0
417	0	0	3	0	2	1	2	0	2	2	0
418	0	0	2	1	6	1	0	0	2	2	1
419	0	0	3	0	2	1	0	3	2	5	1
420	0	0	3	0	2	0	0	0	0	1	0
421	0	1	2	1	4	1	0	0	2	2	0
422	0	0	2	1	1	1	3	3	2	5	0
423	0	0	3	1	1	0	3	3	2	5	0
424	0	0	0	0	9	0	0	0	2	2	0
425	0	0	1	1	4	1	0	3	2	5	0
426	0	0	2	0	1	1	3	3	2	5	0
427	0	0	1	0	1	1	2	0	2	2	0
428	0	0	2	1	0	1	0	0	2	0	1
429	0	0	1	1	7	0	1	0	2	2	1
430	0	1	2	0	3	0	2	3	2	5	1
431	0	1	0	1	6	0	2	0	2	2	0
432	0	0	0	0	9	1	2	1	2	0	1
433	0	0	2	0	1	1	0	1	2	0	1
434	0	0	1	0	1	0	3	0	0	1	0
435	0	0	2	0	1	1	3	1	2	0	0
436	0	1	1	2	1	0	0	1	2	0	0
437	0	0	2	1	4	1	0	0	2	2	0
438	0	0	2	1	1	1	2	1	2	0	1
439	0	0	3	0	2	1	3	1	2	0	0
440	0	0	1	0	1	1	2	1	2	0	0
441	0	0	1	1	1	1	0	1	2	0	1
442	0	0	1	0	1	1	3	0	2	2	1
443	0	0	3	0	1	1	0	0	2	2	1
444	0	1	3	0	1	0	3	1	2	0	0
445	0	0	3	0	1	1	3	0	2	0	0
446	0	0	2	0	1	1	2	0	0	1	1
447	0	0	0	0	1	0	1	0	2	2	0
448	0	0	2	0	1	1	2	0	0	1	0
449	0	1	2	1	6	1	0	0	0	1	1
450	0	0	3	0	1	1	2	1	2	0	0
451	0	0	3	0	2	0	0	0	2	2	1
452	0	0	0	0	9	0	0	0	0	1	1
453	0	1	3	0	1	1	2	1	2	0	0
454	0	0	1	1	1	1	2	1	2	0	1
455	0	0	2	0	1	1	0	1	2	0	1
456	0	1	2	1	4	0	1	1	2	0	0
457	0	0	2	1	1	1	0	1	2	0	0
458	0	0	1	0	4	1	1	1	2	0	1
459	0	0	0	0	1	0	2	0	2	2	0
460	0	0	2	0	1	1	3	1	2	0	0
461	0	1	2	0	3	1	3	0	0	1	1
462	0	0	2	0	1	1	2	0	2	2	0
463	0	0	1	0	0	1	2	1	2	0	0
464	0	0	3	0	2	1	2	1	2	0	0
465	0	0	0	1	0	0	2	0	0	1	1
466	0	0	2	0	1	1	3	1	2	0	1
467	0	1	1	0	3	1	2	0	0	1	0
468	0	0	2	0	1	1	3	0	0	1	1
469	0	0	2	1	4	1	3	1	2	0	0
470	0	0	1	1	0	1	0	1	2	0	1
471	0	0	1	1	8	0	2	0	2	2	0
472	0	0	1	0	1	1	2	0	2	2	0
473	0	0	3	0	2	1	2	3	2	5	1
474	0	0	1	1	0	1	0	0	2	2	0
475	0	1	0	1	4	1	0	1	2	0	1
476	0	0	0	0	9	0	2	0	2	2	0
477	0	0	0	0	1	0	2	0	2	2	0
478	0	0	2	0	1	1	2	0	2	2	0
479	0	0	1	0	1	0	3	1	2	0	0
480	0	0	0	2	0	1	0	1	2	0	1
481	0	0	1	1	0	1	0	0	2	2	0
482	0	0	0	0	1	0	2	0	2	2	0
483	0	0	0	1	0	0	0	0	2	2	0
484	0	0	2	1	8	1	0	0	2	2	0
485	0	0	1	0	1	1	3	1	2	0	0
486	0	0	3	0	1	1	3	1	2	0	0
487	0	0	1	0	1	1	0	0	2	2	0
488	0	0	3	1	7	1	3	3	2	5	0
489	0	0	2	0	1	1	2	0	2	0	0
490	0	0	1	1	0	1	0	3	2	5	1
491	0	0	3	1	1	1	0	1	2	0	0
492	0	0	3	0	1	1	2	1	2	0	1
493	0	0	2	1	1	1	0	0	2	2	0
494	0	0	2	0	1	1	0	0	0	1	0
495	0	1	2	0	1	0	2	0	0	1	0
496	0	0	2	0	1	1	0	0	2	2	0
497	0	0	2	0	1	1	3	0	2	2	1
498	0	0	2	1	0	1	0	0	2	2	0
499	0	0	0	1	4	0	0	1	2	0	0
500	0	0	0	0	1	0	2	1	2	0	0
501	0	0	0	2	7	0	0	0	2	2	0
502	0	1	1	0	1	0	0	0	2	2	0
503	0	0	0	0	1	0	2	0	2	2	0
504	0	0	3	0	1	1	3	0	0	1	0
505	0	0	2	0	1	1	3	0	2	2	1
506	0	0	2	1	1	1	3	0	2	2	0
507	0	1	2	0	3	0	0	0	2	2	0
508	0	0	1	1	0	1	3	1	2	0	1
509	0	0	0	0	9	0	0	0	2	2	0
510	0	0	1	1	0	1	0	1	2	0	1
511	0	0	0	0	7	1	0	1	2	0	0
512	0	0	2	1	0	1	0	1	2	0	0
513	0	1	1	1	1	1	2	1	2	0	1
514	0	0	1	1	6	0	1	1	2	0	0
515	0	0	0	1	0	0	0	0	0	1	0
516	0	0	2	1	8	1	0	1	2	0	1
517	0	0	0	0	9	0	0	1	2	0	0
518	0	0	1	0	1	1	0	1	2	0	1
519	0	1	3	1	1	1	0	1	2	0	1
520	0	0	3	1	2	1	3	1	2	0	1
521	0	0	1	1	1	1	3	1	2	0	1
522	0	1	2	1	1	1	2	1	2	0	1
523	0	1	2	0	3	1	3	1	2	0	0
524	0	0	2	1	1	0	3	1	2	0	1
525	0	0	2	1	4	1	0	1	2	0	1
526	0	1	2	0	3	1	3	4	2	5	1
527	0	0	3	0	0	1	3	1	2	0	1
528	0	0	0	0	1	0	3	0	2	2	0
529	2	1	0	1	1	1	2	2	3	5	0
530	2	0	2	1	1	1	3	2	1	4	1
531	2	0	2	0	1	1	2	2	1	4	1
532	2	0	0	1	0	1	2	2	4	3	0
533	2	0	1	0	1	0	3	2	3	5	0
534	2	0	0	0	9	0	0	2	3	5	1
535	2	0	0	0	1	0	3	2	4	3	0
536	2	0	1	0	1	1	0	2	4	3	1
537	2	0	2	0	1	1	2	2	3	5	1
538	2	0	1	0	0	1	2	2	4	3	0
539	2	0	0	0	9	0	2	2	4	3	0
540	2	0	0	0	9	0	2	2	4	3	0
541	2	1	0	1	6	0	0	2	3	2	0
542	2	0	1	0	1	1	3	2	3	2	0
543	2	0	2	1	1	1	2	2	4	3	0
544	2	0	1	1	1	0	2	2	4	3	0
545	2	0	0	0	9	0	2	2	4	3	0
546	2	0	1	1	4	1	0	2	1	4	0
547	2	0	0	0	9	0	0	2	4	3	0
548	2	0	0	0	1	0	3	2	3	5	0
549	2	0	1	1	1	0	3	2	1	4	1
550	2	0	2	1	2	1	2	2	3	5	1
551	2	0	2	1	1	1	3	2	1	4	1
552	2	0	3	1	7	1	0	2	3	5	1
553	2	1	3	0	2	1	0	2	1	4	1
554	2	0	1	1	1	1	3	2	4	3	0
555	2	0	0	0	9	0	0	2	4	3	0
556	2	0	1	1	7	1	0	2	4	3	1
557	2	0	1	1	1	1	2	2	1	4	1
558	2	0	2	1	1	1	2	2	1	4	1
559	2	0	0	0	9	0	2	2	4	3	1
560	2	0	0	0	9	0	2	2	4	3	1
561	2	1	0	0	9	0	2	2	4	3	0
562	2	0	1	0	1	1	2	2	4	3	1
563	2	0	0	0	9	0	0	2	4	3	0
564	2	0	2	0	6	1	0	2	4	3	0
565	2	0	2	2	1	1	3	2	4	3	1
566	2	1	0	0	9	0	2	2	4	3	0
567	2	0	0	0	9	0	2	2	1	4	0
568	2	0	1	0	1	1	3	2	1	4	0
569	2	0	0	0	9	0	2	2	4	3	0
570	2	0	1	1	8	1	0	2	4	3	0
571	2	0	3	1	1	1	2	2	4	3	0
572	2	1	3	1	7	0	0	2	3	5	1
573	2	0	0	0	1	0	2	2	4	3	0
574	2	0	0	0	1	1	1	2	4	3	0
575	2	0	1	1	6	1	2	2	4	3	0
576	2	0	0	0	9	0	0	2	1	4	0
577	2	0	1	1	1	1	2	2	3	2	0
578	2	1	2	1	4	1	0	2	3	5	1
579	2	0	0	1	1	0	2	2	4	3	0
580	2	1	2	0	1	0	0	2	3	5	0
581	2	0	3	1	5	1	0	2	1	4	0
582	2	0	2	1	1	1	2	2	4	3	0
583	2	0	1	0	1	1	3	2	1	4	0
584	2	1	1	0	1	0	3	2	1	4	0
585	2	0	1	1	1	1	2	2	4	3	0
586	2	0	1	0	1	1	0	2	4	3	0
587	2	0	1	0	1	1	3	2	1	4	0
588	2	1	0	0	9	0	2	2	4	3	0
589	2	0	1	0	0	1	2	2	3	2	1
590	2	0	0	0	9	0	2	2	4	3	0
591	2	0	2	1	6	1	0	2	1	4	0
592	2	0	3	1	1	1	0	2	3	5	0
593	2	0	0	0	1	0	2	2	1	4	0
594	2	0	0	0	1	1	2	2	4	3	0
595	2	0	0	1	1	0	3	2	4	3	0
596	2	0	2	0	1	0	3	2	4	3	0
597	2	0	3	0	2	1	2	2	3	5	0
598	2	0	0	0	9	1	0	2	4	3	0
599	2	0	0	0	1	0	2	2	4	3	0
600	2	0	0	0	1	1	3	2	4	3	0
601	2	0	1	0	1	1	3	2	4	3	0
602	2	1	0	0	4	0	0	2	1	4	0
603	2	1	0	0	9	0	2	2	1	4	0
604	2	0	0	0	9	1	0	2	4	3	0
605	2	0	2	0	1	1	3	2	4	3	0
606	2	0	2	0	1	1	3	2	4	3	0
607	2	0	2	0	1	1	2	2	1	4	0
608	2	0	0	0	9	0	0	2	4	3	0
609	2	0	0	0	9	0	2	2	3	2	1
610	2	1	0	1	9	0	2	2	4	3	0
611	2	1	0	0	9	0	0	2	3	5	1
612	2	0	1	1	7	0	0	2	1	4	0
613	2	0	2	1	7	1	0	2	1	4	0
614	2	0	0	0	1	1	3	2	3	2	0
615	2	1	0	0	3	0	2	2	3	2	1
616	2	0	1	0	1	0	2	2	1	4	0
617	2	1	0	0	1	0	2	2	4	3	1
618	2	0	3	0	2	1	0	2	3	5	1
619	1	1	0	0	9	0	2	5	3	5	0
620	1	1	2	0	1	1	2	2	3	0	1
621	1	1	2	1	6	1	0	2	3	0	1
622	1	0	1	1	1	1	0	2	1	4	1
623	1	0	0	0	9	0	2	5	3	5	1
624	1	1	0	0	3	0	2	6	1	4	1
625	1	1	2	0	3	1	3	5	1	4	1
626	1	1	0	0	9	0	2	6	1	4	1
627	1	0	0	0	9	0	2	2	3	5	0
628	1	1	0	0	9	0	2	6	1	4	1
629	1	0	1	2	1	0	0	6	1	4	1
630	1	0	1	1	1	1	2	2	3	0	1
631	1	0	1	1	4	1	1	5	3	0	1
632	1	0	0	0	9	0	2	5	1	4	1
633	1	1	3	0	2	0	0	2	3	0	1
634	1	0	3	0	2	1	0	5	3	5	1
635	1	0	2	0	1	1	3	2	3	0	1
636	1	0	2	2	8	1	0	2	3	0	1
637	1	0	2	1	1	1	2	5	3	0	1
638	1	1	0	0	9	0	2	5	3	0	0
639	1	0	0	1	0	0	0	2	3	0	1
640	1	1	1	1	1	1	2	2	3	0	1
641	1	0	0	1	1	0	2	5	3	0	1
642	1	0	1	1	6	1	0	2	3	0	1
643	1	0	3	1	2	1	2	2	3	0	1
644	1	0	1	1	5	1	0	5	3	5	0
645	1	1	1	1	4	1	0	2	3	0	0
646	1	1	3	1	4	0	0	2	3	0	1
647	1	0	1	0	1	1	2	2	3	0	0
648	1	0	0	1	1	0	2	2	3	0	0
649	1	1	1	1	5	1	0	2	3	0	1
650	1	1	2	1	4	1	0	2	3	0	0
651	1	1	2	1	4	0	0	2	3	0	1
652	1	1	0	0	9	0	2	5	3	0	0
653	1	0	1	1	1	1	0	2	3	0	1
654	1	0	1	1	1	1	2	2	3	0	1
655	1	0	2	1	1	1	2	2	3	0	0
656	1	1	1	2	4	0	0	5	3	5	1
657	1	0	2	2	6	1	0	2	3	0	1
658	1	0	1	0	1	1	0	2	3	0	0
659	1	0	0	0	9	0	2	2	3	0	1
660	1	0	0	0	9	1	3	2	3	5	0
661	1	0	1	1	1	0	2	2	3	0	1
662	1	0	2	2	7	0	0	5	3	0	1
663	1	1	2	1	4	1	0	2	3	0	0
664	1	1	1	1	3	0	2	2	3	0	0
665	1	0	1	2	6	0	0	2	3	0	1
666	1	0	2	1	1	1	2	2	3	0	0
667	1	1	1	0	1	1	2	2	3	0	1
668	1	0	3	0	1	1	3	2	3	0	1
669	1	0	1	1	0	0	0	5	3	0	1
670	1	1	1	1	4	1	0	2	3	0	1
671	1	1	3	0	2	1	3	2	3	0	1
672	1	0	2	0	1	0	3	5	3	0	1
673	1	0	0	0	9	0	3	5	3	0	1
674	1	0	0	0	9	1	2	5	3	0	1
675	1	1	0	0	9	0	2	5	3	0	1
676	1	0	2	1	4	1	2	2	3	0	1
677	1	0	0	1	1	0	2	5	3	0	1
678	1	1	1	1	4	0	0	5	3	0	1
679	1	0	0	0	9	0	3	5	3	0	1
680	1	0	0	0	1	1	2	5	3	0	1
681	1	1	0	0	1	0	2	5	3	0	1
682	1	0	3	2	0	1	0	5	3	0	1
683	1	0	1	1	1	0	0	2	3	0	1
684	1	1	0	0	9	1	0	2	3	0	1
685	1	0	2	1	4	1	0	5	3	0	1
686	1	0	1	1	1	0	3	5	3	0	0
687	1	1	2	0	1	1	3	2	3	0	1
688	1	0	1	0	0	1	2	5	3	5	1
689	1	0	3	0	2	1	0	5	3	0	1
690	1	0	2	2	8	1	0	2	3	0	1
691	1	1	1	1	4	0	0	5	3	0	1
692	1	0	3	2	4	0	1	2	3	0	1
693	1	1	1	1	7	1	2	2	3	0	1
694	1	1	1	1	4	1	0	2	3	0	1
695	1	0	1	1	5	1	2	6	3	0	1
696	1	0	2	1	1	1	3	2	3	0	1
697	1	0	2	1	1	1	2	2	3	0	1
698	1	0	0	0	9	0	2	5	1	4	0
699	1	0	1	0	1	1	3	6	3	0	1
700	1	1	0	0	9	0	2	6	1	4	0
701	1	0	2	0	1	1	3	2	3	0	1
702	1	0	2	2	6	1	0	2	3	0	1
703	1	1	1	2	6	1	0	5	1	4	0
704	1	0	2	1	5	1	0	2	1	4	1
705	1	0	3	2	1	1	0	5	1	4	1
706	1	0	2	0	1	1	2	2	1	4	1
707	1	1	0	0	9	0	3	6	1	4	0
708	1	0	1	0	0	1	2	2	3	0	1
709	1	1	2	1	6	1	0	5	3	0	1
710	1	0	1	0	1	1	3	5	3	0	1
711	1	0	2	1	1	1	2	2	3	0	1
712	1	0	2	0	1	1	2	5	1	4	1
713	1	0	0	0	9	0	2	6	3	0	1
714	1	1	0	0	9	0	0	5	1	4	1
715	1	0	2	2	5	1	1	2	3	0	1
716	1	1	1	1	3	1	2	2	1	4	0
717	1	1	0	0	9	0	0	2	3	0	1
718	1	0	1	2	4	1	0	2	1	4	1
719	1	0	2	1	1	1	3	2	3	0	1
720	1	0	2	2	1	1	3	5	3	0	1
721	1	1	2	0	3	1	2	5	3	0	0
722	1	1	0	0	9	0	2	5	1	4	1
723	1	0	1	0	1	0	3	2	3	0	1
724	1	0	1	1	1	1	2	2	3	0	1
725	1	0	0	1	1	1	0	2	3	0	1
726	1	0	1	0	1	0	0	2	3	0	1
727	1	0	2	2	1	1	2	5	3	0	1
728	1	0	2	1	4	1	0	2	3	0	1
729	1	0	1	1	1	1	3	5	3	0	1
730	1	0	2	2	6	0	0	2	3	0	1
731	1	1	1	2	4	0	0	5	3	0	1
732	1	0	2	0	1	1	0	2	3	0	1
733	1	0	1	1	4	1	0	5	3	5	1
734	1	0	2	0	1	1	0	5	3	0	1
735	1	0	2	1	1	1	0	2	3	0	1
736	1	0	0	1	6	0	2	2	3	0	1
737	1	0	0	0	1	0	0	2	3	0	1
738	1	1	1	0	3	1	2	2	3	0	1
739	1	1	1	1	4	0	2	5	1	4	1
740	1	1	3	1	4	0	3	5	3	0	1
741	1	0	1	0	1	1	0	2	3	0	1
742	1	1	0	0	1	0	3	2	1	4	1
743	1	1	0	0	3	1	0	2	3	0	1
744	1	0	1	0	1	1	3	5	3	0	1
745	1	0	0	1	1	0	2	2	3	0	1
746	1	1	0	0	9	0	2	5	1	4	1
747	1	1	0	1	1	1	0	5	1	4	1
748	1	1	0	0	1	1	3	5	3	0	1
749	1	1	3	0	3	1	3	5	3	5	1
750	1	0	1	1	1	0	3	5	1	4	1
751	1	0	3	0	1	1	2	5	1	4	1
752	1	0	0	0	1	0	3	5	1	4	1
753	1	0	0	0	1	0	0	5	3	0	0
754	1	0	1	0	1	0	3	2	3	0	1
755	1	0	2	2	5	1	0	2	1	4	1
756	1	0	0	0	1	1	3	2	3	0	1
757	1	0	0	1	1	0	2	2	3	5	1
758	1	0	2	2	1	1	2	2	3	0	1
759	1	0	2	2	5	1	1	2	3	0	1
760	1	0	1	2	5	1	0	2	1	4	1
761	1	0	1	0	1	1	2	2	3	0	1
762	1	0	2	1	1	1	3	2	1	4	1
763	1	0	2	1	1	1	2	2	1	4	1
764	1	1	0	0	9	1	2	5	3	0	1
765	1	0	1	0	1	1	3	2	1	4	1
766	1	1	0	0	9	0	2	6	1	4	1
767	1	1	1	1	6	1	0	2	3	0	1
768	1	1	0	0	9	0	2	6	3	5	0
769	1	1	0	0	9	0	2	6	1	4	0
770	1	0	2	1	1	1	3	2	3	0	1
771	1	1	0	0	9	0	2	6	1	4	1
772	1	0	1	1	0	1	0	2	1	4	0
773	1	0	2	2	4	1	1	2	3	0	1
774	1	1	0	0	7	1	0	6	1	4	0
775	1	0	1	0	1	1	0	5	3	0	1
776	1	1	0	1	1	0	2	5	1	4	1
777	1	0	2	1	0	0	0	2	3	0	1
778	1	0	1	1	1	1	2	2	1	4	0
779	1	1	0	0	9	0	2	5	1	4	0
780	1	1	2	0	9	1	0	5	3	0	0
781	1	1	1	0	1	0	3	5	1	4	0
782	1	1	0	0	1	0	3	5	1	4	1
783	1	0	3	0	1	1	2	5	3	0	0
784	1	1	0	0	9	0	2	5	1	4	0
785	1	1	0	0	9	0	0	5	3	0	1
786	1	0	3	1	7	1	1	2	3	0	1
787	1	0	0	1	9	0	3	5	1	4	0
788	1	0	1	1	7	1	2	2	3	0	1
789	1	1	2	1	1	1	2	2	3	0	1
790	1	1	1	2	5	0	0	2	3	0	1
791	1	1	1	1	1	0	2	5	1	4	0
792	1	1	1	2	6	1	1	2	3	0	1
793	1	0	1	2	6	0	1	5	3	0	1
794	1	1	1	1	3	1	0	2	3	0	1
795	1	1	2	1	4	0	0	5	3	0	1
796	1	0	3	1	6	1	2	2	1	4	1
797	1	1	2	1	4	1	0	2	3	0	1
798	1	1	0	1	1	0	2	2	3	0	1
799	1	1	0	0	9	0	2	6	1	4	0
800	1	0	0	0	9	0	0	5	3	0	1
801	1	0	2	1	1	1	3	2	1	4	0
802	1	1	2	0	1	1	2	2	3	5	0
803	1	1	0	0	3	1	2	2	3	0	1
804	1	1	0	0	7	1	2	2	3	0	1
805	1	0	2	1	4	0	0	5	1	4	1
806	1	0	2	2	6	1	0	5	3	0	1
807	1	0	2	1	6	1	0	6	3	0	0
808	1	1	3	0	2	1	0	2	3	0	1
809	1	0	2	1	1	1	3	2	3	0	1
810	1	1	3	1	4	1	0	2	3	0	1
811	1	0	0	0	1	0	2	5	1	4	0
812	1	0	1	2	1	0	3	2	3	0	0
813	1	1	0	0	9	0	2	5	1	4	1
814	1	1	0	0	9	0	2	5	1	4	0
815	1	1	0	0	1	1	2	5	1	4	1
816	1	0	0	1	1	1	2	5	1	4	1
817	1	0	0	2	7	0	0	2	3	0	1
818	1	1	2	0	3	1	2	2	3	0	1
819	1	1	0	1	4	1	0	5	1	4	0
820	1	0	1	1	7	1	0	5	3	0	1
821	1	1	0	1	6	0	0	5	1	4	0
822	1	0	2	1	1	1	2	2	3	0	1
823	1	0	3	2	1	1	3	2	1	4	1
824	1	1	2	1	4	1	0	2	3	0	1
825	1	1	0	0	9	0	2	5	1	4	0
826	1	1	0	0	1	1	0	5	1	4	0
827	1	0	0	0	9	0	2	6	3	5	0
828	1	1	0	0	9	1	2	5	1	4	0
829	1	1	1	0	3	1	2	5	3	0	0
830	1	0	3	0	2	1	0	2	3	0	1
831	1	1	2	1	4	1	1	2	3	0	1
832	1	1	2	2	6	1	1	5	3	0	1
833	1	0	2	1	1	0	3	5	1	4	0
834	1	1	1	0	3	1	2	5	3	0	1
835	1	0	0	0	9	0	2	5	3	0	1
836	1	0	1	1	0	1	2	2	3	0	1
837	1	1	0	1	6	1	0	5	3	0	1
838	1	1	1	1	3	1	0	2	3	0	1
839	1	0	1	1	4	0	0	2	3	0	1
840	1	1	0	0	9	0	2	5	1	4	1
841	1	1	1	1	0	1	0	5	1	4	1
842	1	1	0	0	9	0	2	5	1	4	1
843	1	0	2	1	4	1	0	5	1	4	0
844	1	0	1	2	6	1	0	5	3	0	1
845	1	1	0	0	9	0	2	5	1	4	1
846	1	1	1	1	5	1	0	5	3	0	1
847	1	1	2	0	3	1	0	2	3	0	1
848	1	0	1	1	1	1	3	2	3	0	1
849	1	0	1	1	1	1	3	5	3	0	1
850	1	1	0	0	9	0	2	5	1	4	1
851	1	1	0	1	7	0	0	5	1	4	1
852	1	0	2	0	1	1	2	2	3	0	1
853	1	1	0	0	9	0	2	5	1	4	0
854	1	1	0	0	9	0	3	5	3	0	1
855	1	1	1	2	6	0	0	6	1	4	1
856	1	1	0	0	9	0	2	5	1	4	0
857	1	0	2	1	0	1	0	5	1	4	0
858	1	0	0	0	9	0	2	5	3	0	1
859	1	1	0	0	9	0	2	5	1	4	1
860	1	1	2	1	3	1	2	5	3	0	1
861	1	1	1	0	3	1	0	2	3	0	1
862	1	1	0	0	1	1	2	5	3	0	0
863	1	1	0	0	9	0	2	5	1	4	0
864	1	1	0	0	9	0	1	6	1	4	1
865	1	0	1	0	1	0	3	5	3	0	1
866	1	0	2	1	0	1	0	5	3	0	1
867	1	0	1	1	5	1	0	2	3	0	1
868	1	0	3	2	1	1	2	2	3	0	1
869	1	1	1	0	9	0	2	5	1	4	1
870	1	1	0	1	1	0	2	5	1	4	1
871	1	0	3	2	4	1	1	5	3	0	1
872	1	0	1	0	1	1	2	2	3	0	0
873	1	0	2	1	1	1	2	6	3	0	1
874	1	0	1	2	1	1	0	2	1	4	1
875	1	1	1	0	3	1	0	2	3	0	1
876	1	0	2	2	7	1	2	5	3	0	1
877	1	0	2	0	1	1	3	2	3	0	1
878	1	0	2	1	5	1	2	5	1	4	1
879	1	1	1	0	1	1	3	5	1	4	1
880	1	0	0	0	9	0	2	5	1	4	1
881	1	1	1	0	3	1	2	5	1	4	1
882	1	1	0	0	9	0	2	6	1	4	1
883	1	1	2	0	3	0	2	2	1	4	1
884	1	0	1	1	1	1	3	5	1	4	0
885	1	0	0	0	6	1	0	5	3	0	1
886	1	0	0	1	0	0	2	5	1	4	1
887	1	1	0	0	9	0	0	2	1	4	1
888	1	1	0	0	1	0	0	5	1	4	0
889	1	0	3	1	4	1	0	2	1	4	1
890	1	0	1	1	0	1	0	5	3	0	1
891	1	0	3	1	1	1	3	2	3	0	1
892	1	0	2	1	0	1	0	5	3	0	1
893	1	1	0	0	3	1	2	5	3	0	1
894	1	1	1	0	3	1	2	5	3	5	0
895	1	1	1	0	3	1	2	2	3	0	1
896	1	0	3	1	7	1	2	5	3	0	0
897	1	0	3	0	2	1	2	2	3	0	1
898	1	1	0	0	1	0	3	2	3	0	1
899	1	1	2	0	3	1	2	2	3	0	1
900	1	1	0	1	1	0	2	2	1	4	1
